# Supplementary material for: Comparison of a Group-/Home-Based and a Weight-Machine-Based Exercise Training for Patients with Hip or Knee Osteoarthritis—A Secondary Analysis of Two Trial Interventions in a Real-World Context
Source: MDPI journal article supplement (doi:10.3390/ijerph192417088), 2022-12-19
Supplement: s1 [file s1]

**Supplement S1:** In-and exclusion criteria for participation in the exercise interventions (regular font) and additional criteria for the accompanying study (*italic font*). Modified version of the original source: Krauss I, et al. BMJ Open Sport Exerc Med 2017; 3: e000291.

---

**Inclusion criteria**

---

- Hip or knee complaints (OA, state after joint-preserving or joint-replacing surgery and corresponding curative care, pre-arthritic conditions)
  - Physical and mental ability to participate in the interventional program *and to answer self-administered questionnaires*
  - *Self-reported lifetime prevalence of hip and/or knee OA diagnosed by a medical practitioner*
  - *Insurance holder of the insurance company offering the exercise program for two or more years*
- 

**Exclusion criteria**

---

- Significant established osteoporosis requiring treatment, previous spontaneous or low impact fracture
  - Co-morbidities leading to major impairments in everyday life and representing contra-indications for physical activities
  - Artificial joint replacement at the knee and/or hip joint within the last 6 months
  - Artificial joint replacement at the knee and/or hip joint with instable anchoring
  - Artificial joint replacement at the knee and/or hip joint with radiologic signs of implant loosening
  - Current pain at rest or with activity due to artificial joint replacement at the knee and/or hip joint
  - Luxation as an adverse event of artificial hip replacement
  - Acute joint inflammation at the knee and/or hip joint
  - Musculo-skeletal surgery at the lower extremity within the last 3 months
  - Regular use of gait aids
  - Self-reported acute illness
  - Insufficient German language ability *for self-administered study questionnaires* and for the understanding of the verbal exercise instructions and written exercise descriptions and intervention materials.
  - *Current employment in the health care insurance*
-
