# Supplementary material for: Comparison of a Group-/Home-Based and a Weight-Machine-Based Exercise Training for Patients with Hip or Knee Osteoarthritis—A Secondary Analysis of Two Trial Interventions in a Real-World Context
Source: MDPI journal article supplement (doi:10.3390/ijerph192417088), 2022-12-19
Supplement: s1 [file s1]

**Supplement S3:** Linear mixed models of WOMAC pain and function.

| <i>Variables</i>                                       | <b>WOMAC pain (1p)</b> |               |                  | <b>WOMAC function (1f)</b> |               |                  |
|--------------------------------------------------------|------------------------|---------------|------------------|----------------------------|---------------|------------------|
|                                                        | Estimate               | 95% CI        | p                | Estimate                   | 95% CI        | p                |
| Intercept                                              | 0.18                   | -0.63 – 1.00  | 0.664            | -0.27                      | -1.02 – 0.49  | 0.490            |
| T1 (vs T0)                                             | 0.12                   | -0.30 – 0.54  | 0.586            | 0.29                       | -0.09 – 0.67  | 0.136            |
| Treatment GHT (vs MbT)                                 | -0.20                  | -0.60 – 0.20  | 0.339            | -0.01                      | -0.39 – 0.38  | 0.977            |
| Baseline Severity [medium]                             | 1.66                   | 1.17 – 2.15   | <b>&lt;0.001</b> | 1.67                       | 1.22 – 2.12   | <b>&lt;0.001</b> |
| Baseline Severity [high]                               | 4.06                   | 3.57 – 4.55   | <b>&lt;0.001</b> | 4.17                       | 3.68 – 4.65   | <b>&lt;0.001</b> |
| Time [T1]* Treatment HKT                               | -0.01                  | -0.49 – 0.46  | 0.951            | -0.08                      | -0.51 – 0.34  | 0.697            |
| Time [T1]* Baseline Severity [medium]                  | -0.64                  | -1.20 – -0.07 | <b>0.029</b>     | -0.76                      | -1.25 – -0.27 | <b>0.003</b>     |
| Time [T1]* Baseline Severity [high]                    | -1.31                  | -1.90 – -0.72 | <b>&lt;0.001</b> | -1.28                      | -1.82 – -0.73 | <b>&lt;0.001</b> |
| Treatment [HKT]* Baseline Severity [medium]            | 0.04                   | -0.51 – 0.59  | 0.896            | -0.07                      | -0.57 – 0.43  | 0.783            |
| Treatment [HKT]* Baseline Severity [high]              | 0.22                   | -0.33 – 0.77  | 0.444            | -0.19                      | -0.72 – 0.35  | 0.498            |
| Time [T1]* Treatment [HKT]* Baseline Severity [medium] | 0.05                   | -0.60 – 0.69  | 0.886            | 0.46                       | -0.11 – 1.02  | 0.116            |
| Time [T1]* Treatment [HKT]* Baseline Severity [high]   | -0.06                  | -0.73 – 0.60  | 0.856            | 0.47                       | -0.14 – 1.08  | 0.133            |
| Age                                                    | 0.01                   | 0.00 – 0.02   | <b>0.022</b>     | 0.01                       | 0.00 – 0.02   | <b>0.020</b>     |
| Female (vs male)                                       | 0.04                   | -0.14 – 0.21  | 0.702            | -0.02                      | -0.18 – 0.15  | 0.855            |
| BMI                                                    | 0.02                   | -0.00 – 0.03  | 0.062            | 0.02                       | 0.01 – 0.04   | <b>0.006</b>     |
| OA site (vs knee)                                      |                        |               |                  |                            |               |                  |
| <i>hip</i>                                             | -0.10                  | -0.31 – 0.10  | 0.330            | -0.13                      | -0.32 – 0.06  | 0.178            |
| <i>both</i>                                            | 0.01                   | -0.19 – 0.21  | 0.943            | 0.08                       | -0.10 – 0.27  | 0.389            |
| Artificial joint                                       | -0.00                  | -0.25 – 0.25  | 0.977            | -0.14                      | -0.38 – 0.09  | 0.222            |

GHT = Group-/home-based training, MbT=Machine-based training.
